# Supplementary material for: lncRNA MEG3 restrained the M1 polarization of microglia in acute spinal cord injury through the HuR/A20/NF‐κB axis
Source: PubMed Central journal article supplement (PMC9425005; doi:10.1111/bpa.13070), 2022-03-25

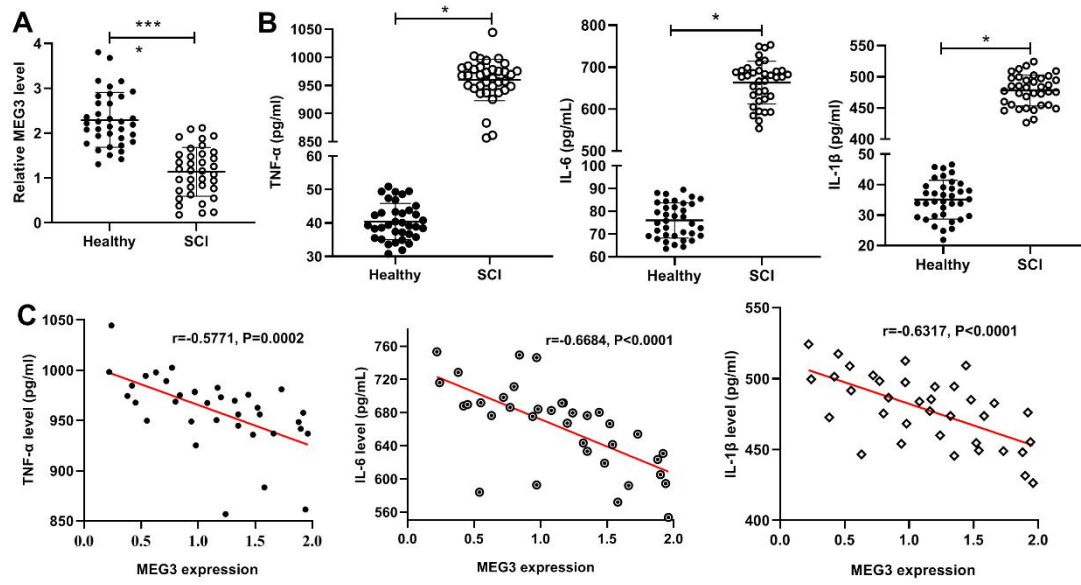

Supplement: BPA-32-e13070-s001.pdf [file BPA-32-e13070-s001.pdf]
